# Supplementary material for: Pip shape echoes grapevine domestication history
Source: PubMed Central journal article supplement (PMC8560759; doi:10.1038/s41598-021-00877-4), 2021-11-01

# Geo (full)

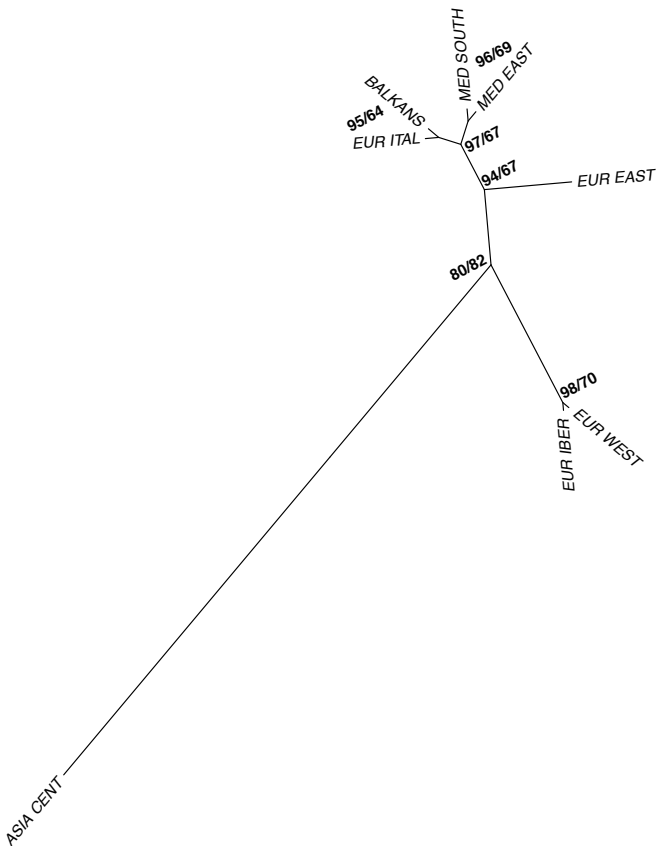

Supplement: 41598_2021_877_MOESM4_ESM.pdf [file 41598_2021_877_MOESM4_ESM.pdf]
