# Supplementary material for: Pip shape echoes grapevine domestication history
Source: Sci Rep. 2021 Nov 1;11:21381. doi: 10.1038/s41598-021-00877-4 (PMC8560759; doi:10.1038/s41598-021-00877-4)
Supplement: Supplementary file 8 — Supplementary Information 8. [file 41598_2021_877_MOESM8_ESM.pdf]

| Variety                                       | Pip length (mm) | Usage | Origin    | SNP4       | SSR5        |
|-----------------------------------------------|-----------------|-------|-----------|------------|-------------|
| Abjouch                                       | 8.78 ± 0.507    | Table | ASIA_CENT | NA         | EAST_Table  |
| Abouhou                                       | 7.19 ± 0.313    | Table | MED_SOUTH | EAST_Table | Admixture   |
| Adanasuri                                     | 7.16 ± 0.38     | Wine  | MED_EAST  | NA         | NA          |
| Adreuli tetri                                 | 6.78 ± 0.312    | Table | MED_EAST  | NA         | NA          |
| Adzjni                                        | 7.12 ± 0.36     | Table | MED_EAST  | NA         | NA          |
| Aetonychi kokkino                             | 7.28 ± 0.473    | Table | BALKANS   | NA         | NA          |
| Aetonychi lefko                               | 6.76 ± 0.298    | Table | BALKANS   | NA         | Admixture   |
| Ag isioum                                     | 5.65 ± 0.286    | Table | MED_EAST  | Admixture  | NA          |
| Agadai                                        | 6.98 ± 0.263    | Wine  | EUR_EAST  | Admixture  | EAST_Table  |
| Agiorgitiko                                   | 6.8 ± 0.23      | Wine  | BALKANS   | NA         | NA          |
| Aglianico                                     | 5.51 ± 0.221    | Wine  | EUR_TAL   | NA         | Admixture   |
| Agomastoso                                    | 6.89 ± 0.206    | Wine  | NA        | NA         | NA          |
| Ahmeur bou Ahmeur                             | 6.89 ± 0.237    | Table | MED_SOUTH | Admixture  | NA          |
| Aridani mavro                                 | 5.65 ± 0.281    | Wine  | BALKANS   | Admixture  | Admixture   |
| Ain el Bouma                                  | 5.59 ± 0.376    | Table | MED_SOUTH | Admixture  | NA          |
| Airén                                         | 6.82 ± 0.212    | Mixed | EUR_IBER  | IBER_Wine  | IBER_WT     |
| Aladasturi                                    | 7.05 ± 0.274    | Wine  | MED_EAST  | NA         | NA          |
| Alarjie                                       | 5.73 ± 0.297    | Wine  | EUR_IBER  | IBER_Wine  | NA          |
| Albaranzouli blanco                           | 6.38 ± 0.277    | Wine  | EUR_TAL   | Admixture  | Admixture   |
| Alexandroouli                                 | 6.57 ± 0.231    | Wine  | MED_EAST  | Admixture  | NA          |
| Alfrocheiro preto                             | 5.52 ± 0.219    | Wine  | EUR_IBER  | WEST_Wine  | NA          |
| Aligoté                                       | 6.23 ± 0.322    | Wine  | EUR_WEST  | NA         | WCEUR_Wine  |
| Alvarinho                                     | 5.24 ± 0.26     | Wine  | EUR_IBER  | WEST_Wine  | Admixture   |
| Amaral                                        | 5.88 ± 0.201    | Wine  | EUR_IBER  | WEST_Wine  | WCEUR_Wine  |
| Amessasse                                     | 6.54 ± 0.305    | Table | MED_SOUTH | NA         | NA          |
| Amigne                                        | 5.22 ± 0.227    | Wine  | EUR_WEST  | Admixture  | Admixture   |
| Amokrane                                      | 7.06 ± 0.429    | Table | MED_SOUTH | NA         | Admixture   |
| Anceflotta                                    | 5.85 ± 0.18     | Wine  | EUR_TAL   | WEST_Wine  | Admixture   |
| Ansonica                                      | 6.9 ± 0.27      | Mixed | EUR_ITAL  | Admixture  | Admixture   |
| Araklino                                      | 6.55 ± 0.347    | Wine  | BALKANS   | Admixture  | Admixture   |
| Aramon                                        | 6.05 ± 0.351    | Wine  | EUR_WEST  | NA         | NA          |
| Arbane                                        | 6.91 ± 0.386    | Wine  | EUR_WEST  | Admixture  | Admixture   |
| Arinto do Dão                                 | 5.85 ± 0.453    | Mixed | EUR_IBER  | NA         | NA          |
| Arna-guina                                    | 7.53 ± 0.181    | Wine  | MED_EAST  | Admixture  | Admixture   |
| Arneis                                        | 6.74 ± 0.235    | Wine  | EUR_TAL   | Admixture  | Admixture   |
| Arrouya                                       | 6.19 ± 0.321    | Wine  | EUR_WEST  | WEST_Wine  | Admixture   |
| Arvine                                        | 5.71 ± 0.34     | Wine  | EUR_WEST  | WEST_Wine  | Admixture   |
| Asprouda Patron                               | 6.54 ± 0.307    | Wine  | BALKANS   | NA         | Admixture   |
| Asprouda Santorinis                           | 6.59 ± 0.21     | Wine  | BALKANS   | Admixture  | Admixture   |
| Assail ai arous                               | 7.55 ± 0.421    | Table | MED_EAST  | EAST_Table | EAST_Table  |
| Assouad karech                                | 6.54 ± 0.291    | Wine  | MED_EAST  | EAST_Table | EAST_Table  |
| Assouad koupti                                | 6.3 ± 0.315     | Wine  | MED_EAST  | Admixture  | EAST_Table  |
| Asswad Abou Khislé                            | 8.45 ± 0.482    | Table | MED_EAST  | EAST_Table | EAST_Table  |
| Assyrtiko                                     | 6.91 ± 0.362    | Wine  | BALKANS   | Admixture  | NA          |
| Asuretuli shavi                               | 6.08 ± 0.26     | Wine  | MED_EAST  | NA         | NA          |
| Athiri (Thraspithiri)                         | 6.13 ± 0.332    | Mixed | BALKANS   | NA         | Admixture   |
| Avassirkhva                                   | 6.49 ± 0.271    | Wine  | MED_EAST  | Admixture  | Admixture   |
| Babeasca neagra                               | 5.57 ± 0.264    | Wine  | BALKANS   | NA         | NA          |
| Babica crna                                   | 6.21 ± 0.319    | Wine  | BALKANS   | Admixture  | Admixture   |
| Bachet                                        | 6.55 ± 0.363    | Wine  | EUR_WEST  | NA         | Admixture   |
| Badagui noir                                  | 6.53 ± 0.223    | Wine  | MED_EAST  | Admixture  | Admixture   |
| Bajor kék                                     | 6.58 ± 0.309    | Wine  | BALKANS   | BALK_Wine  | NA          |
| Balkhitiro                                    | 6.84 ± 0.404    | Wine  | ASIA_CENT | Admixture  | NA          |
| Baratsusha szürke                             | 6.27 ± 0.319    | Wine  | BALKANS   | Admixture  | Admixture   |
| Barbera                                       | 6.99 ± 0.375    | Wine  | EUR_TAL   | NA         | Admixture   |
| Baresana                                      | 7.4 ± 0.327     | Table | EUR_BAL   | EAST_Table | NA          |
| Baserri                                       | 5.91 ± 0.232    | Wine  | EUR_WEST  | WEST_Wine  | WCEUR_Wine  |
| Basicaata                                     | 5.59 ± 0.315    | Table | BALKANS   | BALK_Wine  | BALK_Wine   |
| Batoca                                        | 6.26 ± 0.215    | Wine  | EUR_IBER  | NA         | NA          |
| Battuta neagra                                | 6.48 ± 0.306    | Mixed | BALKANS   | NA         | BALK_Wine   |
| Bayadi de Syrie                               | 6.59 ± 0.355    | Table | MED_EAST  | Admixture  | Admixture   |
| Bayadi du Liban                               | 7.24 ± 0.412    | Table | MED_EAST  | NA         | EAST_Table  |
| Bayan shirei                                  | 6.28 ± 0.316    | Wine  | MED_EAST  | Admixture  | EAST_Table  |
| Bellone                                       | 7.14 ± 0.275    | Wine  | EUR_TAL   | Admixture  | Admixture   |
| Benedicto de Aragon                           | 5.98 ± 0.264    | NA    | NA        | NA         | NA          |
| Berbecel                                      | 5.9 ± 0.337     | Wine  | BALKANS   | NA         | BALK_Wine   |
| Bermestia bianca                              | 7.54 ± 0.289    | Table | EUR_TAL   | Admixture  | Admixture   |
| Beylerce                                      | 5.85 ± 0.271    | Mixed | MED_EAST  | NA         | Admixture   |
| Bicane                                        | 7.79 ± 0.318    | Table | NA        | Admixture  | Admixture   |
| Black morocco                                 | 8.8 ± 0.461     | Table | MED_SOUTH | Admixture  | NA          |
| Bobal                                         | 5.74 ± 0.304    | Wine  | EUR_IBER  | Admixture  | NA          |
| Bondola                                       | 6.83 ± 0.304    | Wine  | EUR_WEST  | Admixture  | Admixture   |
| Borchalo                                      | 6.16 ± 0.239    | Wine  | MED_EAST  | NA         | NA          |
| Bourboulenc                                   | 6.81 ± 0.301    | Wine  | EUR_WEST  | Admixture  | NA          |
| Bouteillan noir                               | 6.28 ± 0.318    | Wine  | EUR_WEST  | NA         | NA          |
| Brachetto                                     | 5.35 ± 0.369    | Wine  | EUR_TAL   | Admixture  | Admixture   |
| Braghina                                      | 6.8 ± 0.272     | Mixed | BALKANS   | BALK_Wine  | NA          |
| Brun fourca                                   | 7.29 ± 0.443    | Wine  | EUR_WEST  | Admixture  | NA          |
| Bzavanura                                     | 5.38 ± 0.346    | Wine  | MED_EAST  | NA         | NA          |
| Cabernet franc                                | 7.8 ± 0.463     | Wine  | EUR_WEST  | Admixture  | WCEUR_Wine  |
| Cabernet-Sauvignon                            | 5.29 ± 0.507    | Wine  | EUR_WEST  | NA         | NA          |
| Cahours                                       | 7.01 ± 0.242    | Wine  | EUR_WEST  | Admixture  | Admixture   |
| Caïno bravo                                   | 6.31 ± 0.25     | NA    | NA        | NA         | NA          |
| Calabrese                                     | 6.72 ± 0.32     | Wine  | EUR_TAL   | Admixture  | NA          |
| Calitor blanc de semis                        | 6.37 ± 0.334    | Wine  | EUR_WEST  | NA         | NA          |
| Carcajolo                                     | 6.94 ± 0.416    | Wine  | EUR_IBER  | Admixture  | NA          |
| Cardinal                                      | 6.43 ± 0.467    | Table | NEW_WORLD | Admixture  | NA          |
| Carignan                                      | 5.78 ± 0.505    | Wine  | EUR_IBER  | Admixture  | NA          |
| Casetta                                       | 7.14 ± 0.24     | Wine  | EUR_TAL   | WEST_Wine  | Admixture   |
| Castelão                                      | 6.17 ± 0.341    | Mixed | EUR_IBER  | Admixture  | NA          |
| Castellana bianca                             | 6.53 ± 0.187    | Wine  | EUR_IBER  | Admixture  | NA          |
| Cayetana blanca                               | 6.75 ± 0.288    | Wine  | EUR_IBER  | IBER_Wine  | NA          |
| Chaani biely                                  | 6.89 ± 0.47     | Table | MED_EAST  | NA         | NA          |
| Chahanni                                      | 7.12 ± 0.238    | Table | MED_EAST  | Admixture  | Admixture   |
| Chami                                         | 6.91 ± 0.378    | Table | MED_SOUTH | NA         | Admixture   |
| Chaouch blanc                                 | 7.03 ± 0.386    | Table | MED_EAST  | Admixture  | NA          |
| Chaptal                                       | 7.4 ± 0.533     | Table | EUR_WEST  | EAST_Table | Admixture   |
| Chardonnay                                    | 5.17 ± 0.293    | Wine  | EUR_WEST  | Admixture  | WCEUR_Wine  |
| Chasselas                                     | 6.56 ± 0.287    | Mixed | EUR_WEST  | WEST_Wine  | NA          |
| Chatus                                        | 5.33 ± 0.228    | Wine  | EUR_WEST  | WEST_Wine  | NA          |
| Chekobali                                     | 6.74 ± 0.119    | Wine  | MED_EAST  | NA         | NA          |
| Chevka                                        | 6.04 ± 0.36     | Wine  | BALKANS   | NA         | EAST_Table  |
| Chinuri                                       | 6.85 ± 0.297    | Wine  | MED_EAST  | NA         | NA          |
| Chiroka Melnichka                             | 6.68 ± 0.251    | Wine  | BALKANS   | NA         | BALK_Wine   |
| Chkaveri                                      | 6.51 ± 0.238    | Wine  | MED_EAST  | NA         | NA          |
| Chouchouli                                    | 6.8 ± 0.297     | Wine  | EUR_WEST  | WEST_Wine  | WCEUR_Wine  |
| Ciklap                                        | 6.32 ± 0.218    | NA    | NA        | NA         | NA          |
| Cinsaut                                       | 6.31 ± 0.228    | Mixed | EUR_WEST  | Admixture  | Admixture   |
| Clairette                                     | 6.47 ± 0.44     | Mixed | EUR_WEST  | Admixture  | NA          |
| Coda vulpii                                   | 7.2 ± 0.181     | Table | BALKANS   | EAST_Table | Admixture   |
| Coda di volpe bianca                          | 5.75 ± 0.232    | Wine  | EUR_TAL   | Admixture  | NA          |
| Colorino                                      | 6.21 ± 0.324    | Wine  | EUR_ITAL  | Admixture  | Admixture   |
| Cot                                           | 6.13 ± 0.456    | Wine  | EUR_WEST  | NA         | NA          |
| Courbu                                        | 6.27 ± 0.268    | Wine  | EUR_WEST  | WEST_Wine  | NA          |
| Criolla grande sanjuanina                     | 6.77 ± 0.234    | Mixed | NEW_WORLD | Admixture  | ITACE_Table |
| Croatina                                      | 6.44 ± 0.345    | Wine  | EUR_ITAL  | Admixture  | NA          |
| Dabouki                                       | 7.44 ± 0.4      | Table | MED_EAST  | EAST_Table | NA          |
| Darkaia noir = Coarna neagra                  | 6.36 ± 0.443    | Table | MED_SOUTH | Admixture  | NA          |
| Dattier de Beyrouth                           | 7.48 ± 0.376    | Table | MED_EAST  | Admixture  | NA          |
| Debina                                        | 7.2 ± 0.344     | Wine  | BALKANS   | NA         | BALK_Wine   |
| Deckrot                                       | 5.22 ± 0.205    | Wine  | EUR_WEST  | WEST_Wine  | WCEUR_Wine  |
| Dedo de Dama                                  | 7.79 ± 0.364    | Table | EUR_IBER  | Admixture  | IBER_WT     |
| Dermatas                                      | 7.54 ± 0.376    | Mixed | BALKANS   | Admixture  | IBER_WT     |
| Diminitis                                     | 6.78 ± 0.335    | Wine  | BALKANS   | NA         | NA          |
| Dirmit                                        | 6.14 ± 0.378    | Wine  | MED_EAST  | Admixture  | Admixture   |
| Dobricic                                      | 6.19 ± 0.24     | Wine  | BALKANS   | NA         | NA          |
| Doight du neigne                              | 7.21 ± 0.316    | Table | MED_EAST  | EAST_Table | Admixture   |
| Dolcetto                                      | 5.91 ± 0.206    | Wine  | EUR_ITAL  | Admixture  | Admixture   |
| Dominga                                       | 7.11 ± 0.393    | Table | EUR_IBER  | Admixture  | Admixture   |
| Donzelinho branco                             | 5.97 ± 0.352    | Wine  | EUR_IBER  | Admixture  | NA          |
| Dornfelder                                    | 6.58 ± 0.181    | Wine  | EUR_WEST  | NA         | Admixture   |
| Doukkali = Bezoul et aouda ; Bezoul el Khadem | 6.9 ± 0.345     | Table | MED_SOUTH | NA         | Admixture   |
| Doux d'Henry                                  | 6.81 ± 0.273    | Mixed | EUR_ITAL  | NA         | NA          |
| Duras                                         | 5.7 ± 0.413     | Wine  | EUR_WEST  | NA         | WCEUR_Wine  |
| Dureza                                        | 5.28 ± 0.284    | Wine  | EUR_WEST  | WEST_Wine  | WCEUR_Wine  |
| Dzigandize                                    | 7.05 ± 0.281    | Wine  | MED_EAST  | NA         | NA          |
| Endeladzeuli                                  | 6.55 ± 0.344    | Wine  | MED_EAST  | NA         | NA          |
| Epinou                                        | 5.84 ± 0.233    | Wine  | EUR_WEST  | Admixture  | WCEUR_Wine  |
| Espadeno tinto                                | 6.36 ± 0.237    | Wine  | EUR_IBER  | Admixture  | Admixture   |
| Falanghina                                    | 6.7 ± 0.366     | Wine  | EUR_TAL   | Admixture  | Admixture   |
| Fer                                           | 6.47 ± 0.311    | Wine  | EUR_WEST  | WEST_Wine  | WCEUR_Wine  |
| Ferlongo                                      | 6.74 ± 0.216    | Table | EUR_IBER  | Admixture  | Admixture   |
| Ferral tamara                                 | 6.77 ± 0.258    | Table | EUR_IBER  | NA         | IBER_WT     |
| Feruani                                       | 6.88 ± 0.291    | Wine  | MED_EAST  | NA         | NA          |
| Feteasca alba                                 | 5.36 ± 0.23     | Wine  | BALKANS   | Admixture  | BALK_Wine   |
| Fita alba                                     | 5.78 ± 0.213    | Wine  | BALKANS   | NA         | BALK_Wine   |
| Flora                                         | 5.82 ± 0.213    | Table | NEW_WORLD | WEST_Wine  | WCEUR_Wine  |
| Fodja                                         | 8.26 ± 0.291    | Table | MED_EAST  | NA         | NA          |
| Fokiano                                       | 7.35 ± 0.251    | Mixed | BALKANS   | Admixture  | Admixture   |
| Fondo de Orza                                 | 6.32 ± 0.389    | Table | EUR_IBER  | Admixture  | Admixture   |
| François noir                                 | 6.35 ± 0.171    | Wine  | EUR_WEST  | NA         | WCEUR_Wine  |
| Frankenthal rouge foncé                       | 7.32 ± 0.245    | Mixed | EUR_TAL   | NA         | ITACE_Table |
| Fuella nera                                   | 6.32 ± 0.22     | Wine  | EUR_WEST  | Admixture  | Admixture   |
| Furmint                                       | 7.17 ± 0.357    | Wine  | BALKANS   | BALK_Wine  | NA          |
| Gaidouria                                     | 5.58 ± 0.323    | Wine  | BALKANS   | NA         | Admixture   |
| Galbena de Odobesti                           | 7.48 ± 0.376    | Wine  | BALKANS   | BALK_Wine  | BALK_Wine   |
| Galbena uriasa                                | 6.84 ± 0.221    | Wine  | BALKANS   | BALK_Wine  | NA          |
| Gamay                                         | 5.82 ± 0.367    | Wine  | EUR_WEST  | Admixture  | NA          |
| GantzianDani                                  | 7.26 ± 0.316    | Table | MED_EAST  | Admixture  | EAST_Table  |
| Garganega                                     | 6.07 ± 0.265    | Mixed | EUR_TAL   | Admixture  | BALK_Wine   |
| Garrido macho                                 | 7.09 ± 0.538    | Mixed | EUR_IBER  | IBER_Wine  | IBER_WT     |
| Gateta                                        | 5.27 ± 0.223    | Mixed | EUR_WEST  | Admixture  | Admixture   |
| Genk Uzum                                     | 6.87 ± 0.308    | Table | MED_EAST  | Admixture  | Admixture   |
| Genovèse                                      | 6.95 ± 0.331    | Wine  | EUR_WEST  | Admixture  | NA          |
| Gibi                                          | 7.14 ± 0.421    | Mixed | EUR_IBER  | IBER_Wine  | IBER_WT     |
| Gines                                         | 6.01 ± 0.346    | Table | NA        | NA         | NA          |
| Glycostaphylla                                | 7.63 ± 0.323    | Wine  | MED_EAST  | Admixture  | Admixture   |
| Glykerithiro                                  | 5.94 ± 0.31     | Wine  | BALKANS   | NA         | Admixture   |
| Golodan                                       | 7.3 ± 0.344     | Table | ASIA_CENT | EAST_Table | EAST_Table  |
| Gorula                                        | 6.5 ± 0.466     | Table | MED_EAST  | NA         | NA          |
| Goruli Mtsveta                                | 6.99 ± 0.292    | Table | MED_EAST  | NA         | NA          |
| Gouais blanc                                  | 5.09 ± 0.308    | Wine  | NA        | BALK_Wine  | NA          |
| Grasa de Cotnari                              | 7.42 ± 0.385    | Wine  | BALKANS   | NA         | BALK_Wine   |
| Grec rouge                                    | 6.35 ± 0.232    | Mixed | EUR_WEST  | Admixture  | Admixture   |
| Grechetto                                     | 6.44 ± 0.304    | Wine  | EUR_TAL   | Admixture  | Admixture   |
| Greco bianco                                  | 6.81 ± 0.409    | Wine  | EUR_ITAL  | Admixture  | Admixture   |
| Greco di Tufo                                 | 5.61 ± 0.253    | Wine  | EUR_TAL   | Admixture  | Admixture   |
| Grenache                                      | 5.39 ± 0.281    | Wine  | EUR_WEST  | IBER_Wine  | NA          |
| Grenache blanc                                | 5.36 ± 0.296    | Wine  | EUR_WEST  | NA         | NA          |
| Grillo                                        | 6.11 ± 0.307    | Wine  | EUR_TAL   | Admixture  | Admixture   |
| Grk                                           | 7.03 ± 0.327    | Wine  | BALKANS   | NA         | Admixture   |
| Gros Colman                                   | 6.92 ± 0.274    | Table | EUR_EAST  | Admixture  | NA          |
| Gros maroc                                    | 7.29 ± 0.329    | Table | NA        | Admixture  | Admixture   |
| Grüner Veltliner                              | 7.37 ± 0.311    | Wine  | EUR_WEST  | Admixture  | Admixture   |
| Hadari                                        | 6.75 ± 0.276    | Table | MED_SOUTH | EAST_Table | Admixture   |
| Hainka                                        | 6.65 ± 0.293    | Mixed | BALKANS   | NA         | BALK_Wine   |
| Hans                                          | 5.54 ± 0.232    | Wine  | EUR_WEST  | NA         | NA          |
| Harslevelu                                    | 5.78 ± 0.422    | Wine  | BALKANS   | BALK_Wine  | BALK_Wine   |
| Hasandede beyazi                              | 6.38 ± 0.261    | Wine  | MED_EAST  | NA         | Admixture   |
| Henab turki                                   | 6.34 ± 0.258    | Table | MED_EAST  | EAST_Table | NA          |
| Henab Turki                                   | 6.19 ± 0.43     | Table | BALKANS   | NA         | NA          |
| Heptaklio                                     | 6.48 ± 0.21     | Wine  | BALKANS   | EAST_Table | Admixture   |
| Heunisch schw                                 | 6.02 ± 0.274    | Wine  | EUR_WEST  | Admixture  | Admixture   |
| Heunisch schwarz                              | 5.48 ± 0.238    | Wine  | EUR_WEST  | Admixture  | WCEUR_Wine  |
| Horoz karasi                                  | 7.21 ± 0.355    | Mixed | MED_EAST  | NA         | Admixture   |
| Humagne blanc                                 | 6.11 ± 0.318    | Wine  | EUR_WEST  | Admixture  | NA          |
| Hunisa                                        | 8.34 ± 0.369    | Table | ASIA_CENT | EAST_Table | NA          |
| Hweidi                                        | 6.93 ± 0.491    | Table | MED_EAST  | EAST_Table | Admixture   |
| Imeruli shavi                                 | 5.89 ± 0.213    | Wine  | MED_EAST  | NA         | NA          |
| Isai Oliver                                   | 6.19 ± 0.334    | Mixed | BALKANS   | Admixture  | Admixture   |
| Ispisari                                      | 7.05 ± 0.294    | Table | BALKANS   | NA         | EAST_Table  |
| Italia                                        | 6.84 ± 0.322    | Table | EUR_TAL   | Admixture  | NA          |
| Itzhaki                                       | 5.94 ± 0.378    | Table | BALKANS   | Admixture  | Admixture   |
| Jahafi                                        | 6.82 ± 0.286    | Table | MED_EAST  | NA         | EAST_Table  |
| July Muscat                                   | 7.22 ± 0.264    | Table | NEW_WORLD | Admixture  | Admixture   |
| Kadarka = Gamza                               | 5.9 ± 0.391     | Wine  | BALKANS   | BALK_Wine  | BALK_Wine   |
| Kadin Barmak                                  | 7.96 ± 0.323    | Table | MED_EAST  | NA         | Admixture   |
| Kalecik siyahi                                | 6.94 ± 0.403    | Wine  | MED_EAST  | NA         | Admixture   |
| Kamuri Shavi                                  | 6.69 ± 0.336    | Wine  | MED_EAST  | NA         | NA          |
| Kara ouzume Aschikhabadsky                    | 6.69 ± 0.226    | Mixed | ASIA_CENT | Admixture  | EAST_Table  |
| Karasaçik                                     | 6.9 ± 0.266     | Wine  | MED_EAST  | NA         | Admixture   |
| Karolowska = Xinomavro                        | 5.89 ± 0.265    | Wine  | NA        | NA         | NA          |
| Kartsiotis                                    | 6.9 ± 0.291     | Wine  | BALKANS   | BALK_Wine  | BALK_Wine   |
| Kasouli de la Bekaa                           | 7.11 ± 0.423    | Table | NA        | NA         | NA          |
| Katsacoulas                                   | 6.61 ± 0.303    | Wine  | MED_EAST  | EAST_Table | Admixture   |
